# Supplementary material
Source: publisher figshare collection journal article supplement (https://frontiersin.figshare.com/ndownloader/files/25428671)
Supplement: Supplementary file [file 25428671]

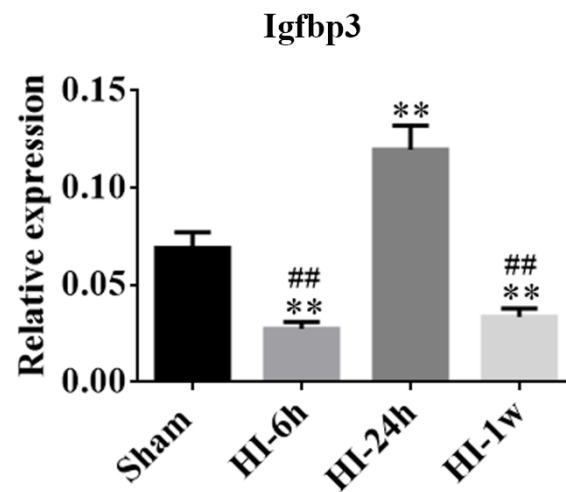

**Supplementary Figure1. The expression of Igfbp3 in sham and HI groups.** Igfbp3 expression in brain tissues was further validated at 6h, 24h, and 1w after HI,  $**P<0.01$  compared with sham group,  $##P<0.01$  compared with HI-24h (24h after HI) group. All data were presented as mean  $\pm$  SD.
